# Supplementary material for: Synthesis of water-soluble chitosan-coated nanoceria with excellent antioxidant properties
Source: Royal Society of Chemistry journal article supplement (doi:10.1039/c3ra22251a), 2013-01-01
Supplement: c3ra22251a.pdf [file c3ra22251a.pdf]

## **- Supplementary Information -**

# **Synthesis of Water-soluble Chitosan-Coated Nanoceria with Excellent Antioxidant Properties**

**Yanwu Zhai<sup>a</sup>, Kebin Zhou<sup>a</sup>, Ying Xue<sup>a</sup>, Fei Qin<sup>a</sup>, Limei Yang<sup>a</sup> and Xin Yao<sup>\*a,b</sup>**

<sup>a</sup>School of Chemistry and Chemical Engineering, University of Chinese Academy of Sciences, Beijing, P. R.China.

<sup>b</sup>State Key Laboratory of Natural and Biomimetic Drugs, Peking University, Beijing, P. R.China.

\*Corresponding author: Fax: +86 10 88256092; Tel: +86 10 88256980;

E-mail: [yaox@ucas.ac.cn](mailto:yaox@ucas.ac.cn)

**Table S1** Assignment of the infrared spectra of free chitosan and of chitosan-coated nanoceria (band positions in  $\text{cm}^{-1}$ )

| <b>Chitosan</b> | <b>chitosan-coated nanoceria</b> | <b>Assignment</b>                                                |
|-----------------|----------------------------------|------------------------------------------------------------------|
| 3350            |                                  | $\nu$ (O - H) + $\nu$ (N - H)                                    |
|                 | 3360                             | $\nu$ (O - H)                                                    |
|                 | 3248                             | $\nu$ (N - H)                                                    |
| 2931, 2895      | 2946                             | $\nu$ (CH <sub>2</sub> ) + $\nu$ (CH <sub>3</sub> ) + $\nu$ (CH) |
| 1613            | 1627                             | amide I                                                          |
| 1512            | 1514                             | amide II + $\delta$ (NH <sub>2</sub> )                           |
| 1416            | 1413                             | $\delta$ (CH <sub>2</sub> ) + $\delta$ (CH <sub>3</sub> )        |
| 1380            | 1352                             | $\delta$ (CH)                                                    |
| 1324            |                                  | amide III                                                        |
| 1248            |                                  |                                                                  |
| 1154            | 1156                             | $\nu_{\text{as}}$ (C - O - C) bridge                             |
| 1080            | 1087                             | $\nu$ (C - O - C) pyranose ring                                  |
